# Supplementary material for: Transmission of Xylella fastidiosa Subspecies Pauca Sequence Type 53 by Different Insect Species
Source: MDPI journal article supplement (doi:10.3390/insects10100324), 2019-09-29
Supplement: s1 [file s1]

**Supplementary Table S1:** Population density of *Philaenus spumarius* and *Neophilaenus campestris* estimated in 2016 by monitoring on weekly basis six different orchards in the infected area.

| Insect species       | Vegetational compartment | Period     |            |            |            |             |             |             |                 |  |  |  |  |  |  |
|----------------------|--------------------------|------------|------------|------------|------------|-------------|-------------|-------------|-----------------|--|--|--|--|--|--|
|                      |                          | 2016       |            |            |            |             |             |             |                 |  |  |  |  |  |  |
|                      |                          | April      | May        | June       | July       | August      | September   | October     | Monthly average |  |  |  |  |  |  |
|                      |                          | Mean (±ES) |            |            |            |             |             |             |                 |  |  |  |  |  |  |
| <i>P. spumarius</i>  | Olive trees              | 1.1 ±0.1 b | 4.5 ±0.4 a | 1.2 ±0.1 b | 1.0 ±0.1 b | 1.0 ±0.1 ab | 0.8 ±0.1 a  | 0.3 ±0.0 ab | 9.8 ±0.1 b      |  |  |  |  |  |  |
| <i>N. campestris</i> |                          | 0.1 ±0.0 c | 1.0 ±0.3 b | 0.0 ±0.0 c | 0.0 ±0.0 c | 0.0 ±0.0 c  | 0.0 ±0.0 c  | 0.1 ±0.0 b  | 1.2 ±0.04 d     |  |  |  |  |  |  |
| <i>P. spumarius</i>  | Ground vegetation        | 3.0 ±0.3 a | 4.4 ±0.4 a | 0.2 ±0.0 c | 0.0 ±0.0 c | 0.3 ±0.0 c  | 0.4 ±0.1 bc | 0.4 ±0.0 a  | 8.7 ±0.07 b     |  |  |  |  |  |  |
| <i>N. campestris</i> |                          | 0.2 ±0.1 c | 0.6 ±0.2 b | 0.0 ±0.0 c | 0.0 ±0.0 c | 0.0 ±0.0 c  | 0.0 ±0.0 c  | 0.1 ±0.0 b  | 0.9 ±0.01 d     |  |  |  |  |  |  |
| <i>P. spumarius</i>  | Border plants            | 0.9 ±0.2 b | 5.4 ±0.5 a | 3.3 ±0.4 a | 2.4 ±0.2 a | 1.1 ±0.1 a  | 0.7 ±0.1 ab | 0.3 ±0.1 ab | 14.0 ±0.2 a     |  |  |  |  |  |  |
| <i>N. campestris</i> |                          | 0.1 ±0.1 c | 1.0 ±0.2 b | 1.4 ±0.1 b | 1.1 ±0.1 b | 0.7 ±0.1 b  | 0.7 ±0.1 a  | 0.4 ±0.1 a  | 5.2 ±0.06 c     |  |  |  |  |  |  |
|                      |                          |            |            |            |            |             |             |             |                 |  |  |  |  |  |  |
| F value              |                          | 46.19      | 28.89      | 44.17      | 81.94      | 28.74       | 16.24       | 4.4         | 57.28           |  |  |  |  |  |  |
| Pr > F               |                          | <0.0001    | <0.0001    | <0.0001    | <0.0001    | <0.0001     | <0.0001     | 0.0024      | <0.0001         |  |  |  |  |  |  |
| d                    |                          | 5          | 5          | 5          | 5          | 5           | 5           | 5           | 5               |  |  |  |  |  |  |
| Significance         |                          | ***        | ***        | ***        | ***        | ***         | ***         | **          | ***             |  |  |  |  |  |  |

**Supplementary Table S2:** Population density of *Philaenus spumarius* and *Neophilaenus. campestris* estimated in 2017 by monitoring on weekly basis six different orchards in the infected area.

| Insect species       | Vegetational compartment | Period     |             |            |            |            |             |            |                 |         |  |        |  |         |  |         |  |
|----------------------|--------------------------|------------|-------------|------------|------------|------------|-------------|------------|-----------------|---------|--|--------|--|---------|--|---------|--|
|                      |                          | 2017       |             |            |            |            |             |            |                 |         |  |        |  |         |  |         |  |
|                      |                          | April      | May         | June       | July       | August     | September   | October    | Monthly average |         |  |        |  |         |  |         |  |
|                      |                          | Mean (±ES) |             |            |            |            |             |            |                 |         |  |        |  |         |  |         |  |
| <i>P. spumarius</i>  | Olive trees              | 0.1 ±0.0 b | 2.6 ±0.2 b  | 0.3 ±0.1 c | 0.4 ±0.1 b | 0.4 ±0.1 b | 0.4 ±0.1 ab | 0.1 ±0.0 b | 4.2 ±0.07 b     |         |  |        |  |         |  |         |  |
| <i>N. campestris</i> |                          | 0.1 ±0.0 b | 0.8 ±0.1 d  | 0.1 ±0.0 c | 0.0 ±0.0 b | 0.1 ±0.0 b | 0.1 ±0.0 b  | 0.1 ±0.0 b | 1.1 ±0.03 d     |         |  |        |  |         |  |         |  |
| <i>P. spumarius</i>  | Ground vegetation        | 0.7 ±0.0 a | 5.4 ±0.1 cd | 0.0 ±0.0 c | 0.0 ±0.0 b | 0.1 ±0.0 b | 0.0 ±0.0 b  | 1.3 ±0.0 a | 7.4 ±0.03 c     |         |  |        |  |         |  |         |  |
| <i>N. campestris</i> |                          | 0.8 ±0.1 a | 3.0 ±0.1 d  | 0.0 ±0.0 c | 0.0 ±0.0 b | 0.0 ±0.0 b | 0.0 ±0.0 b  | 1.1 ±0.0 a | 4.9 ±0.02 cd    |         |  |        |  |         |  |         |  |
| <i>P. spumarius</i>  | Border plants            | 0.0 ±0.0 b | 6.7 ±0.4 a  | 2.2 ±0.2 a | 1.2 ±0.2 a | 0.9 ±0.2 a | 0.7 ±0.1 a  | 0.1 ±0.0 b | 11.8 ±0.4 a     |         |  |        |  |         |  |         |  |
| <i>N. campestris</i> |                          | 0.1 ±0.0 b | 2.1 ±0.2 bc | 1.1 ±0.1 b | 0.2 ±0.1 b | 0.4 ±0.1 b | 0.4 ±0.1 a  | 0.2 ±0.0 b | 4.5 ±0.1 b      |         |  |        |  |         |  |         |  |
|                      |                          |            |             |            |            |            |             |            |                 |         |  |        |  |         |  |         |  |
| F value              |                          | 23.94      |             | 105.00     |            | 73.37      |             | 13.45      |                 | 10.18   |  | 7.04   |  | 68.48   |  | 244.73  |  |
| Pr > F               |                          | <0.0001    |             | <0.0001    |            | <0.0001    |             | <0.0001    |                 | <0.0001 |  | 0.0001 |  | <0.0001 |  | <0.0001 |  |
| d                    |                          | 5          |             | 5          |            | 5          |             | 5          |                 | 5       |  | 5      |  | 5       |  | 5       |  |
| Significance         |                          | ***        |             | ***        |            | ***        |             | ***        |                 | ***     |  | ***    |  | ***     |  | ***     |  |

**Supplementary Table S3:** Results of the real time PCR reactions performed in 2016 and 2017 on the insect specimens collected in infected olive groves throughout the spittlebug adult season.

| Insect species                 | Vegetational compartment | 2016           |              |                |              |                |              |                |              |                |              |                |              |
|--------------------------------|--------------------------|----------------|--------------|----------------|--------------|----------------|--------------|----------------|--------------|----------------|--------------|----------------|--------------|
|                                |                          | May            |              | June           |              | July           |              | August         |              | September      |              | October        |              |
|                                |                          | No. of insects |              | No. of insects |              | No. of insects |              | No. of insects |              | No. of insects |              | No. of insects |              |
|                                |                          | Tested         | Positive (%) | Tested         | Positive (%) | Tested         | Positive (%) | Tested         | Positive (%) | Tested         | Positive (%) | Tested         | Positive (%) |
| <i>Philaenus spumarius</i>     | Olive trees              | 200            | 21 (10.5)    | 199            | 101 (50.75)  | 200            | 99 (49.5)    | 194            | 87 (44.84)   | 157            | 86 (54.78)   | 58             | 29 (50)      |
| <i>Neophilaenus campestris</i> |                          | 75             | 0            | 7              | 0            | 0              | 0            | 2              | 0            | 9              | 0            | 19             | 2 (10.53)    |
| <i>P. spumarius</i>            | Ground vegetation        | 80             | 3 (3.75)     | 0              | 0            | 0              | 0            | 40             | 15 (37.5)    | 21             | 5 (23.81)    | 60             | 35 (58.33)   |
| <i>N. campestris</i>           |                          | 71             | 2 (2.82)     | 0              | 0            | 1              | 0            | 2              | 0            | 9              | 0            | 31             | 0            |
| <i>P. spumarius</i>            | Border plants            | 100            | 6 (6)        | 120            | 13 (10.83)   | 40             | 8 (20)       | 54             | 20 (37.04)   | 40             | 12 (30)      | 13             | 6 (46.15)    |
| <i>N. campestris</i>           |                          | 15             | 0            | 4              | 0            | 1              | 0            | 41             | 0            | 49             | 0            | 24             | 1 (4.17)     |
| 2017                           |                          |                |              |                |              |                |              |                |              |                |              |                |              |
| <i>P. spumarius</i>            | Olive trees              | 160            | 16 (10)      | 44             | 22 (50)      | 59             | 17 (28.81)   | 40             | 7 (17.5)     | 39             | 8 (20.51)    | 0              | 0            |
| <i>N. campestris</i>           |                          | 94             | 7 (7.45)     | 0              | 0            | 0              | 0            | 0              | 0            | 7              | 0            | 33             | 0            |
| <i>P. spumarius</i>            | Ground vegetation        | 80             | 2 (2.5)      | 0              | 0            | 0              | 0            | 0              | 0            | 38             | 7 (18.42)    | 0              | 0            |
| <i>N. campestris</i>           |                          | 40             | 0            | 0              | 0            | 0              | 0            | 0              | 0            | 1              | 0            | 32             | 0            |
| <i>P. spumarius</i>            | Border plants            | 160            | 7 (4.37)     | 80             | 9 (11.25)    | 20             | 1 (5)        | 39             | 5 (12.82)    | 39             | 9 (23.07)    | 6              | 0            |
| <i>N. campestris</i>           |                          | 118            | 1 (0.85)     | 44             | 0            | 5              | 0            | 10             | 0            | 14             | 0            | 14             | 0            |

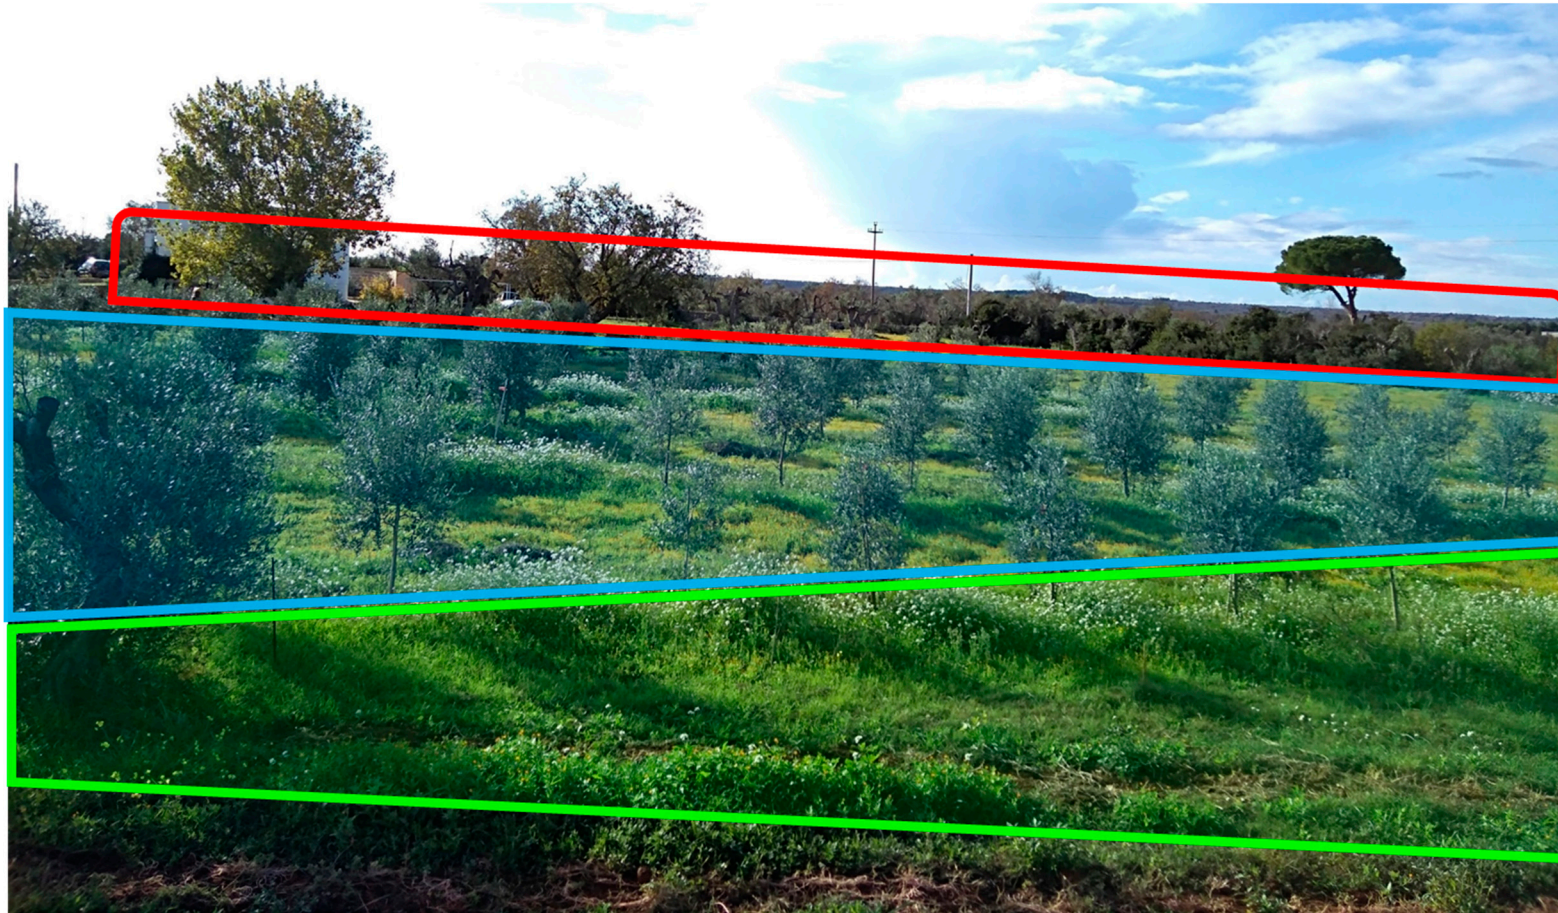

Supplementary Figure S1: Olive orchard selected in the demarcated infected area of Apulia region (southern Italy) for monitoring and collecting spittlebugs in different vegetation compartments: olive canopies (blue rectangle), ground cover vegetation (green rectangle) and border trees/shrubs (red rectangle).



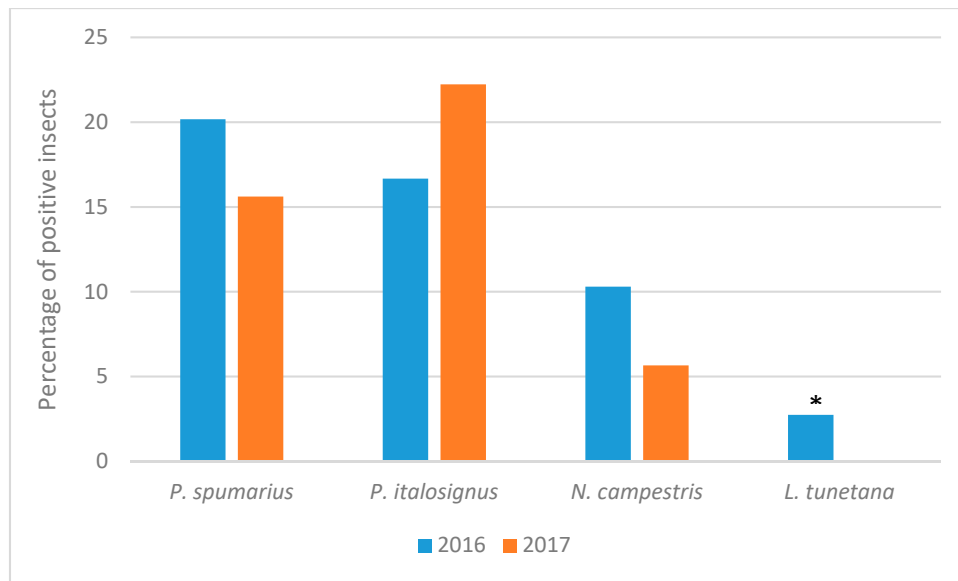

Supplementary Figure S2. Percentage of insects testing positive in real time PCR in 2016 and 2017, after 96 h of acquisition access period, for *Philaenus spumarius*, *P. italosignus* and *Neophilaenus campestris*. \*Adults of *Latilica tunetana* were collected directly from the canopies of field-infected trees
